# Supplementary material for: Association between anthropometric markers of adiposity, adipokines and vitamin D levels
Source: PubMed Central journal article supplement (PMC9474508; doi:10.1038/s41598-022-19409-9), 2022-09-14

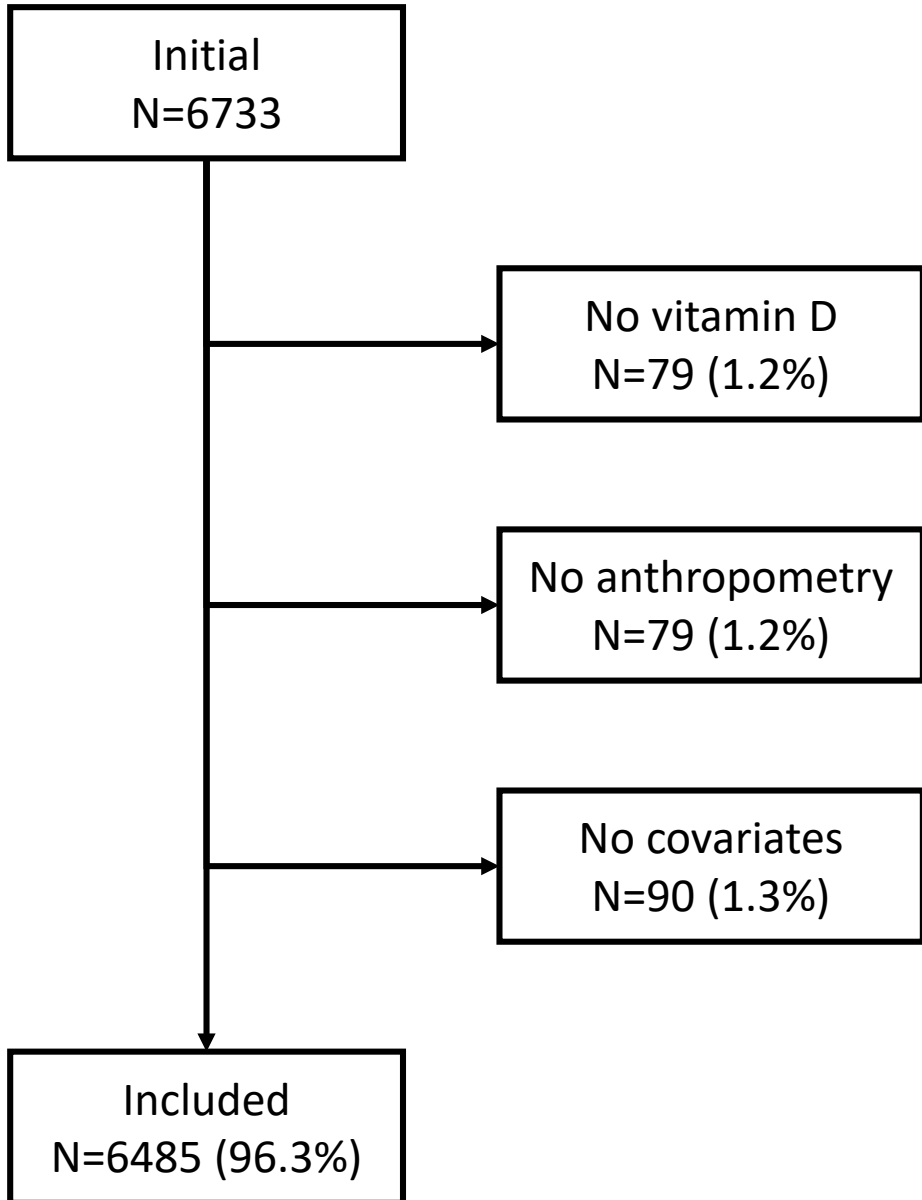

Supplement: 41598_2022_19409_MOESM2_ESM.pdf [file 41598_2022_19409_MOESM2_ESM.pdf]
